# Supplementary material for: Screening candidate microRNAs (miRNAs) in different lambskin hair follicles in Hu sheep
Source: PLoS One. 2017 May 2;12(5):e0176532. doi: 10.1371/journal.pone.0176532 (PMC5413071; doi:10.1371/journal.pone.0176532)
Supplement: S1 Table — (XLSX) [file pone.0176532.s001.xlsx]

## Sheet: Sheet1
S1 Table. Relevant information of genes and primer sequences for Real Time PCR
miRNA	Forward primer（5'–3'）
miRNA-143	ACGGTGAGATGAAGCACTGTAGC
miRNA-10a	CGATACCCTGTAGATCCGAATTTG
let-7c	CACGGCTGAGGTAGTAGGTTGTATG
miR-199a-3p	CGACAGTAGTCTGCACATTGGTTAA
let-7i	CCGTGAGGTAGTAGTTTGTGCTGTT
NW_004080189.1_7961	CCTGTACTGAGCTGCCCCG
NW_004080184.1_6535	AGCCGATATGAACTGGAACCTGT
NW_004080184.1_6326	TCATTTCGCTGTTCGGGC
NW_004080165.1_8572	AAGGTCCCGGACGAGCC
NW_004080166.1_9139	CGAATCCCACTTCTGACACCAA
NW_004080181.1_3961	CCGGCCAACGCACCA
NW_004080174.1_726	TGGGTCGGTCGGGCAA
NW_004080166.1_10417	ATTTCCCCCCACGCCC
NW_004080190.1_13733	CACGGTGAGGTAGTAAGTTGTATTGTTG
U6	TGGAACGATACAGAGAAGATTAGCA
