# Supplementary material for: Screening candidate microRNAs (miRNAs) in different lambskin hair follicles in Hu sheep
Source: PLoS One. 2017 May 2;12(5):e0176532. doi: 10.1371/journal.pone.0176532 (PMC5413071; doi:10.1371/journal.pone.0176532)
Supplement: S2 Table — (XLSX) [file pone.0176532.s002.xlsx]

## Sheet: Sheet1
S2 Table. Predicted targets of the significant differentially expressed miRNA in small waves and large waves
miRNA	Target Gene Symbol
miR-143	LMO4，LOC101120834
NW_004080166.1_9447	ST3GAL3，ES2，ATP6V0B，ELK3，EIF5，ZO2，SLC25A39，RAB30，IGF2BP2，CSGALNACT1，LOC100526789，LMBR1L，PEPT1，KCTD15，TUBB2A，KRT80
Let-7c	LOC101121981，YOD1，TARBP2
NW_004080795.1_13255	STRN，BTF3L4，PREPL，GTF2I，FYCO1，TCF12，ALDOB
NW_004080177.1_2600	STRN，BTF3L4，PREPL，GTF2I，FYCO1，TCF12，ALDOB
NW_004080177.1_2600	ZNF276
NW_004080181.1_3973	SSFA2
NW_004080165.1_8152	EHD4，CERS4，DNAJC7，PIK3CB
NW_004080189.1_7961	NFATC3，TXNRD1，KPNB1，NRN1，FGF1，MEF2A
miR-10a	RCAN3，TCEB1，SLC38A2，SLC38A2
miR-199a-3p	SERPINE2
