# Supplementary material for: Screening candidate microRNAs (miRNAs) in different lambskin hair follicles in Hu sheep
Source: PLoS One. 2017 May 2;12(5):e0176532. doi: 10.1371/journal.pone.0176532 (PMC5413071; doi:10.1371/journal.pone.0176532)
Supplement: S3 Table — (XLSX) [file pone.0176532.s003.xlsx]

## Sheet: Sheet1
S3 Table. Predicted targets of the significant differentially expressed miRNA in medium waves and large waves
miRNA	Target Gene Symbol
NW_004080166.1_10417	EMC1，MTSS1，SBSN，PTP4A2，CERS4，PUM2，C24H16orf72，CAND1，THBS1，MAPK8，VAT1，DIAPH1
NW_004080181.1_3961	MUC15
NW_004080165.1_8918	PIK3R1，EHD4，LOC101107906，PHC2，KRT14，ASPRV1，PYGL，KCTD7，NRN1，LOC101117590，STAC，AGL，FTH1
Let-7i	YOD1，IGF2BP2
NW_004080795.1_13255	PREPL，STRN，FYCO1
NW_004080174.1_726	FAM46A，ATP6V0A1，ARHGAP26，ECD，LOC101122148， ACSL1，LOC101117590，C12H1orf115，CCT3，KRTDAP
NW_004080184.1_6326	LOC100037673，NCAM1，ADCYAP1，PHC2，RAF1，CABLES1，CTTNBP2NL，HMGCL，LMO4，DUT，NRN1，AZIN1，TAX1BP1，NCAM1，MARK3，HARS2，FBXO38
NW_004080170.1_12254	MARK3，LOC101116493
NW_004080166.1_9842	PTK2
NW_004080168.1_11242	PREPL，PHC2，ADAMTS1
NW_004080164.1_5708	SRP68，PREPL，SRP68，VAMP4，SRP68
NW_004080165.1_8572	CKMT1B，FYCO1，CKMT1B
NW_004080172.1_12940	CNST，CRABP2
NW_004080166.1_9139	ELK3，MMD，VPS54，LOC101116493
