# Supplementary material for: Screening candidate microRNAs (miRNAs) in different lambskin hair follicles in Hu sheep
Source: PLoS One. 2017 May 2;12(5):e0176532. doi: 10.1371/journal.pone.0176532 (PMC5413071; doi:10.1371/journal.pone.0176532)
Supplement: S4 Table — (XLSX) [file pone.0176532.s004.xlsx]

## Sheet: Sheet1
S4 Table. Predicted targets of the significant differentially expressed miRNA in small waves and medium waves
miRNA	Target Gene Symbol
NW_004080165.1_8917	CDC42BPA，KIAA1671，TMEM229B，COTL1，LOC101121958，ROCK2，CUX1，KRT14，PBRM1，SUN2，AP2M1，TMEM254，NRN1，STAC，AGL，SMARCD2，LOC780507，LOC101120590，PBRM1，CUX1，FTH1
NW_004080166.1_10417	KIAA1671，MTSS1，THBS1，MAPK8，KPNB1，KRT19，PTP4A2，PBRM1，SUN2，LMO2，ABCF3，ELOVL1，EIF4H，SETD5，B4GALT3，PBRM1
NW_004080183.1_5976	U2AF1L4，RAB31，RAB5B，S100A16，CNFN，CABLES1，SCNN1B，AP2M1，CLSTN3，LOC101105689
NW_004080172.1_13048	HNRNPK，LOC101113221，LOC101114126，TMEM231，CPXM1，CA2，FAM104A，TMEM9B，ABLIM3
NW_004080176.1_1908	IDH3A，UGDH，IDH3A，CHMP2B，TMEM231，SMARCD2，RALGAPB
NW_004080181.1_3961	MT4
NW_004080165.1_8918	CDC42BPA，KIAA1671，TMEM229B，COTL1，LOC101121958，ROCK2，CUX1，KRT14，PBRM1，SUN2，AP2M1，TMEM254，NRN1，STAC，AGL，SMARCD2，LOC780507，LOC101120590，PBRM1，CUX1，FTH1
NW_004080174.1_726	ATP6V0A1，CUX1，POLR2E，POLR2E，ARHGAP26，C12H1orf115，CUX1
NW_004080184.1_6326	PPT1，WDR27，UBR2，CABLES1，MAPK8，KPNB1，DUT，PTGFR，SERPINB2，MBOAT2，NRN1，MARK3，RHNO1，BAZ2B
NW_004080166.1_9842	TMEM231
NW_004080165.1_8884	COTL1，AARS，GGA3，POLR2E，PCP4，ZNF276，POLR2E，BPNT1，ABLIM3，ASAP3
NW_004080164.1_4714	RPTOR，FBXO32，ARRDC3，LAT2，TMEM254，LOC100526785，C12H1orf115，ASAP3
miR-200a	LOC101111178，GLTP，PABPC4
NW_004080165.1_8572	CKMT1B，B4GALT3，CKMT1B
NW_004080182.1_4070	KRT23，S100A16，COTL1，TCF4，CDC25B，IGF2BP2，EIF4H，TMEM231，CBY1，TCF4
miR-10a	TCEB1，SLC38A2，SLC38A2
NW_004080177.1_2323	KRT23，S100A16，COTL1，TCF4，CDC25B，IGF2BP2，EIF4H，TMEM231，CBY1，TCF4
NW_004080164.1_5170	TMEM229B，LEF-1，PSAP，FNDC1，TUBB2A
NW_004080177.1_2324	KRT23，S100A16，COTL1，TCF4，CDC25B，IGF2BP2，EIF4H，TMEM231，CBY1，TCF4
NW_004080164.1_5130	CHFR，PACSIN2，NRBP1，TMEM229B，C3H2orf18，CNFN，COTL1，UBR2，ADD3，IGF2BP2，LOC101117934，RNF170，LOC101106791，CNFN，ABCF1，LOC780507，NOL10，FAM104A，NOL10
